# Supplementary material
Source: publisher figshare collection journal article supplement (https://acs.figshare.com/ndownloader/files/13665344)
Supplement: Supplementary file 1 [file 13665344]

# Supporting Information

**Metallophthalocyanine-based Molecular Dipole Layer as a Universal and Versatile Approach to Realize Efficient and**

**Stable Perovskite Solar Cells**

*Fangchao Li,<sup>†</sup> Jianyu Yuan,<sup>†,\*</sup> Xufeng Ling,<sup>†</sup> Lizhen Huang,<sup>†</sup> Nopporn Rujisamphan,<sup>‡</sup> Youyong Li,<sup>†</sup> Lifeng Chi,<sup>†</sup> Wanli*

*Ma<sup>†,\*</sup>*

<sup>†</sup>Institute of Functional Nano & Soft Materials (FUNSOM), Jiangsu Key Laboratory for Carbon-Based Functional Materials

& Devices, Soochow University, 199 Ren-Ai Road, Suzhou Industrial Park, Suzhou, Jiangsu 215123, P. R. China

<sup>‡</sup>King Mongkut's University of Technology Thonburi (KMUTT) 126 Pracha Uthit

Rd., Bang Mod, Thung Khru, Bangkok 10140, Thailand

Corresponding Author: [jyyuan@suda.edu.cn](mailto:jyyuan@suda.edu.cn) (J. Y.); [wlma@suda.edu.cn](mailto:wлма@suda.edu.cn) (W. Ma).

### **1. Grazing-incidence wide angle X-ray scattering:**

GIWAXS measurements were performed at the Shanghai Synchrotron Radiation Facility (SSRF) Laboratory on Beamline BL14B1 using X-ray with a wavelength of  $\lambda \sim 1.24$  Å. 2D GIWAXS patterns were acquired by a MarCCD mounted vertically at a distance  $\sim 194$  mm from the sample with a grazing incidence angle of  $0.4^\circ$  and an exposure time of 50 s. The 2D GIWAXS patterns were analyzed using the FIT2D software and displayed in scattering vector  $q$  coordinates with  $q = 4\pi \sin\theta/\lambda$ , where  $\theta$  is half of the diffraction angle and  $\lambda$  is the wavelength of incident X-ray.

### **2. Photoluminescence lifetime imaging**

Figure S9 shows the schematic of the time-resolved confocal imaging system, implemented on an ISS Q2 laser scanning nanoscope (ISS Inc., Champaign, Illinois, USA). It is coupled to a Nikon TiU microscope equipped with a Nikon 60X/1.2NA water objective lens. A 405-nm pulsed diode laser was used as the excitation source.

The laser repetition rate was set to be 10 MHz for measuring the Perovskite photoluminescence lifetimes. The emission light after a 480-nm long-pass filter was collected by a single photon counting module avalanche photodiode by Excelitas (model: SPCM-AQRH-14). For each Perovskite sample, a field of 40 $\mu$ m x 40 $\mu$ m was scanned using Galvo mirrors at the sampling rate of 256 x 256 pixels. Both the laser and the scanner were synchronized to the data acquisition unit of FastFLIM by ISS, to record the time-resolved data at each pixel of the image. The phase histogram can be converted to the decay histogram for the time-domain (TD) lifetime fitting data analysis, or processed by the digital Fourier transform (DFT) for the digital frequency-domain (DFD) lifetime fitting data analysis. In TD, the lifetimes are estimated from fitting the decay profiles upon a pre-defined exponential model. In DFD, the phase delays ( $\phi$ ) and modulation ratios ( $m$ ) of the emission relative to the excitation at multiple frequencies are simultaneously obtained by the DFT of the phase histogram, and then fitted upon a pre-defined exponential model to estimate the lifetimes.

### **3. Kelvin probe force microscopy measurements**

The work function of the neat perovskite film and the films w/wo additives are characterized by KPFM through probing the surface potential difference (SPD) between Ti/Ir-coated tip and the samples. The SPD is defined as the following Eq. (1)

$$e \times SPD = WF_t + WF_s \quad (1)$$

Where  $e$  is elementary charge of electron,  $WF_t$  is the work function of Ti/Ir-coated tip, and  $WF_s$  is the work function of sample surface.  $WF_t$  is calibrated using highly

ordered pyrolytic graphite (HOPG) with a constant work function of 4.60 eV. Finally, the work function of samples can be calculated by the Eq. (2):

$$WF_s = 4.60 + e(SPD_{HOPG} - SPD_s) \quad (2)$$

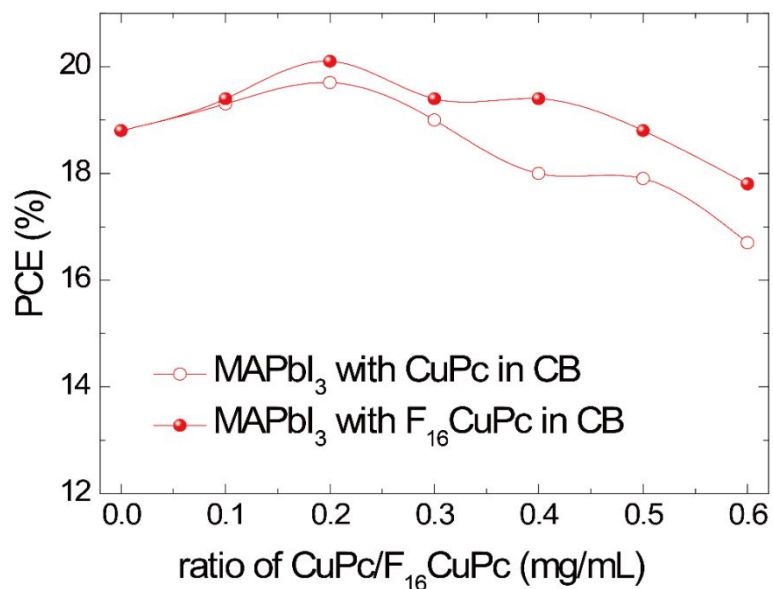

Figure S1. PCE of MAPbI<sub>3</sub> perovskite solar cells with CuPc/F<sub>16</sub>CuPc addition at different concentration.

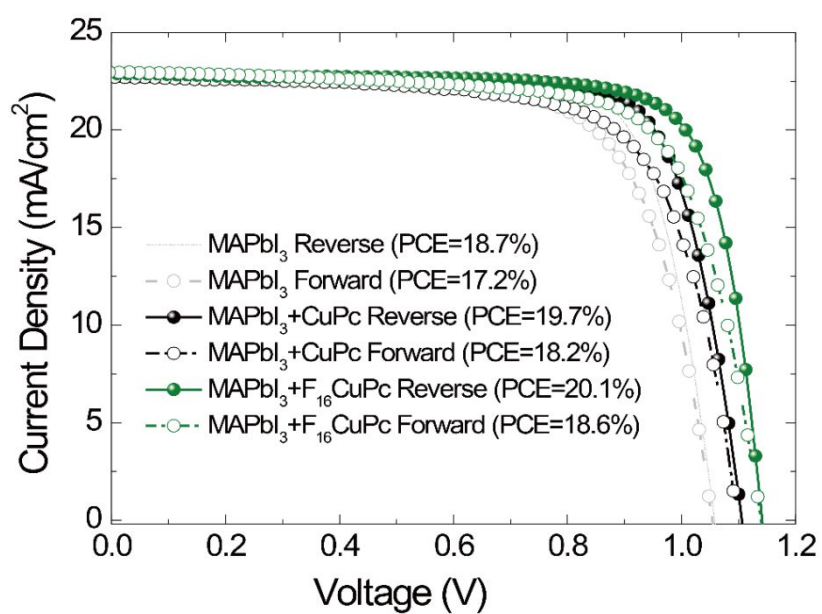

Figure S2. Current–voltage ( $J$ - $V$ ) curves of optimized perovskite solar cells under reverse and forward scans with/without (w/wo) CuPc or F<sub>16</sub>CuPc, measured under AM 1.5 (Hysteresis index, 0.080 for MAPbI<sub>3</sub>, 0.076 for MAPbI<sub>3</sub>+CuPc and 0.075 for MAPbI<sub>3</sub>+F<sub>16</sub>CuPc).

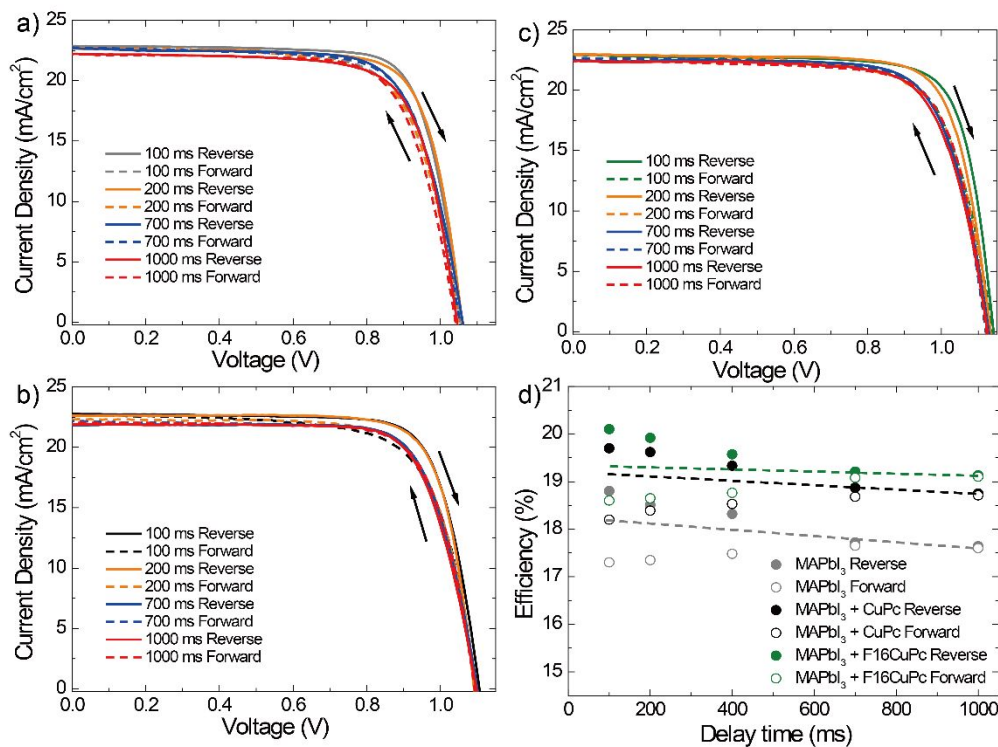

Figure S3. a-c) The hysteresis in current–voltage curves of devices w/wo additives. Arrows denote the sweep direction. d) Efficiency of devices scanning with different delay time.

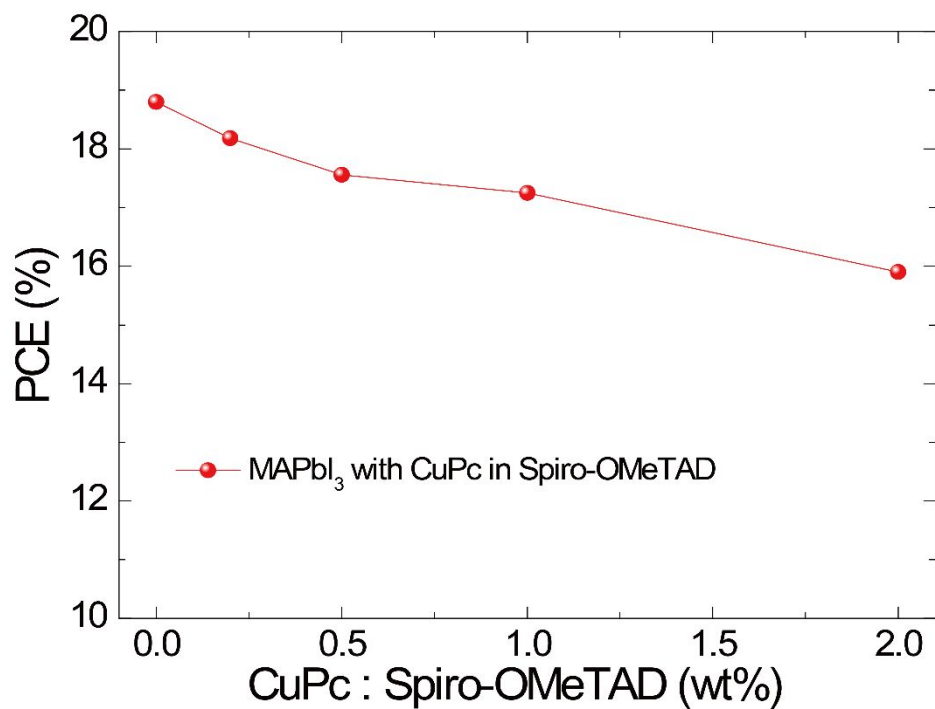

Figure S4 PCE of MAPbI<sub>3</sub> perovskite solar cells with CuPc addition into HTL Spiro-OMeTAD at different concentration.

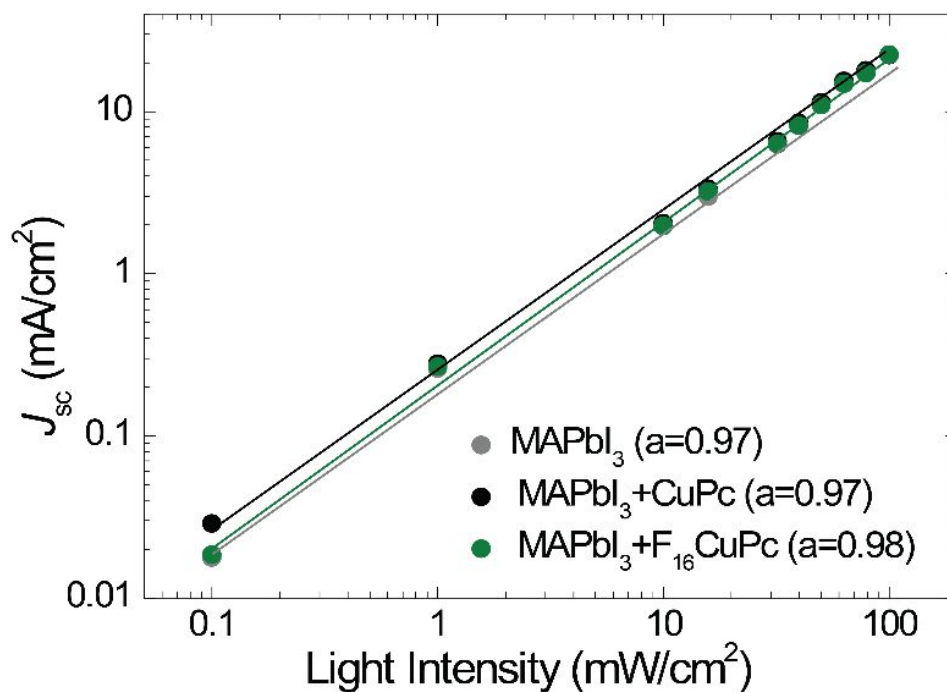

Figure S5.  $J_{sc}$  dependence on illumination intensity w/wo metallophthalocyanine additives, together with linear fits in lines.

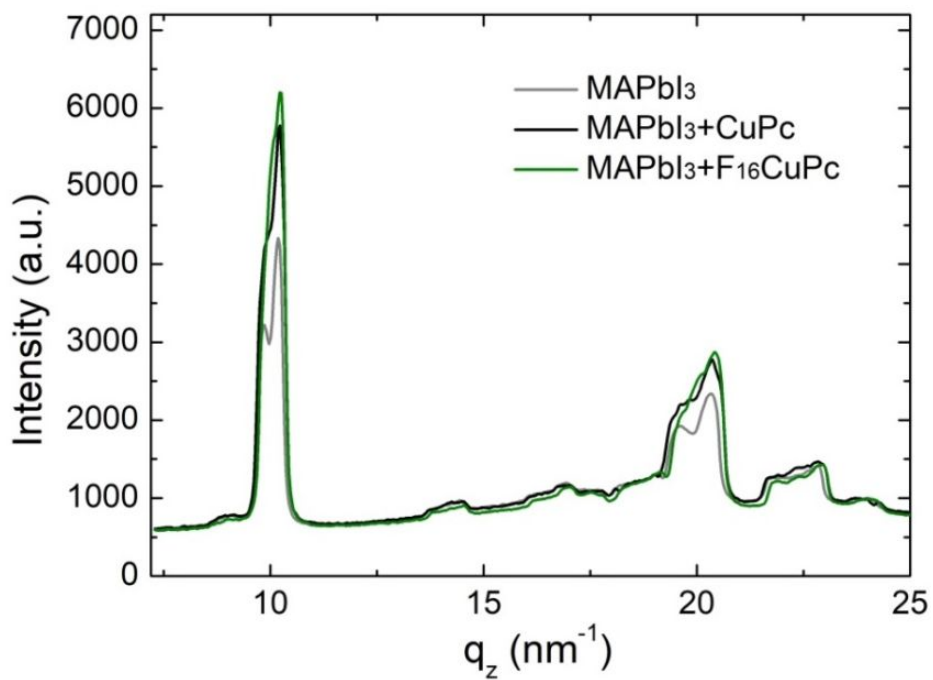

Figure S6. The out-of-plane line-cuts of (110) diffraction of perovskite films w/wo additives.

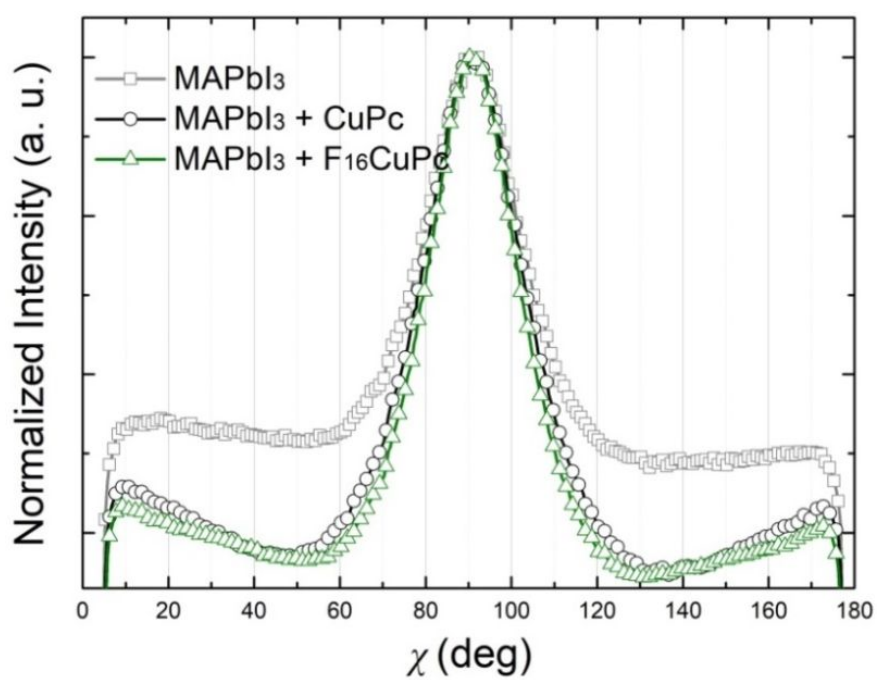

Figure S7. The pole figures extracted from the (110) for corresponding films w/wo additives.

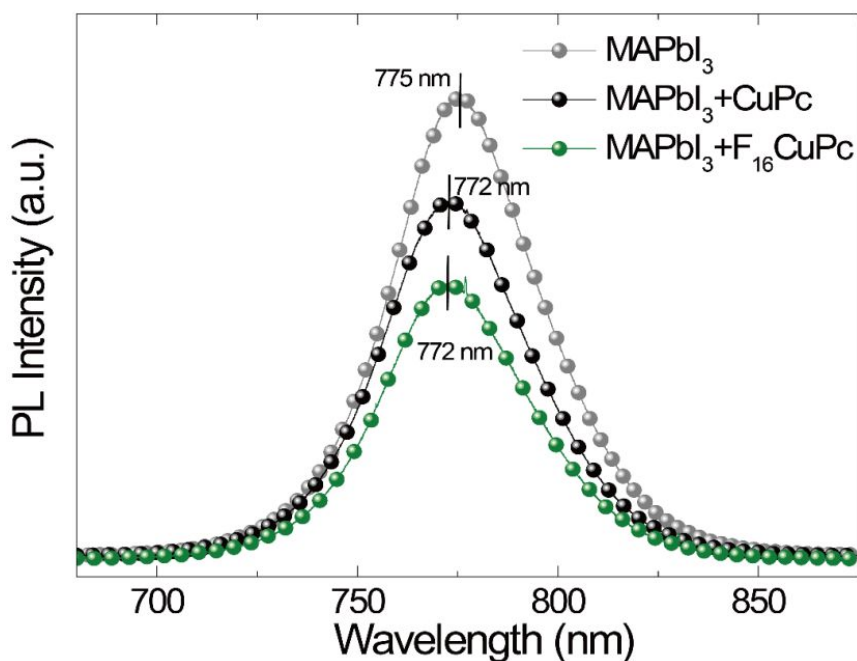

Figure S8. Steady-state PL spectra of corresponding films on quartz substrates.

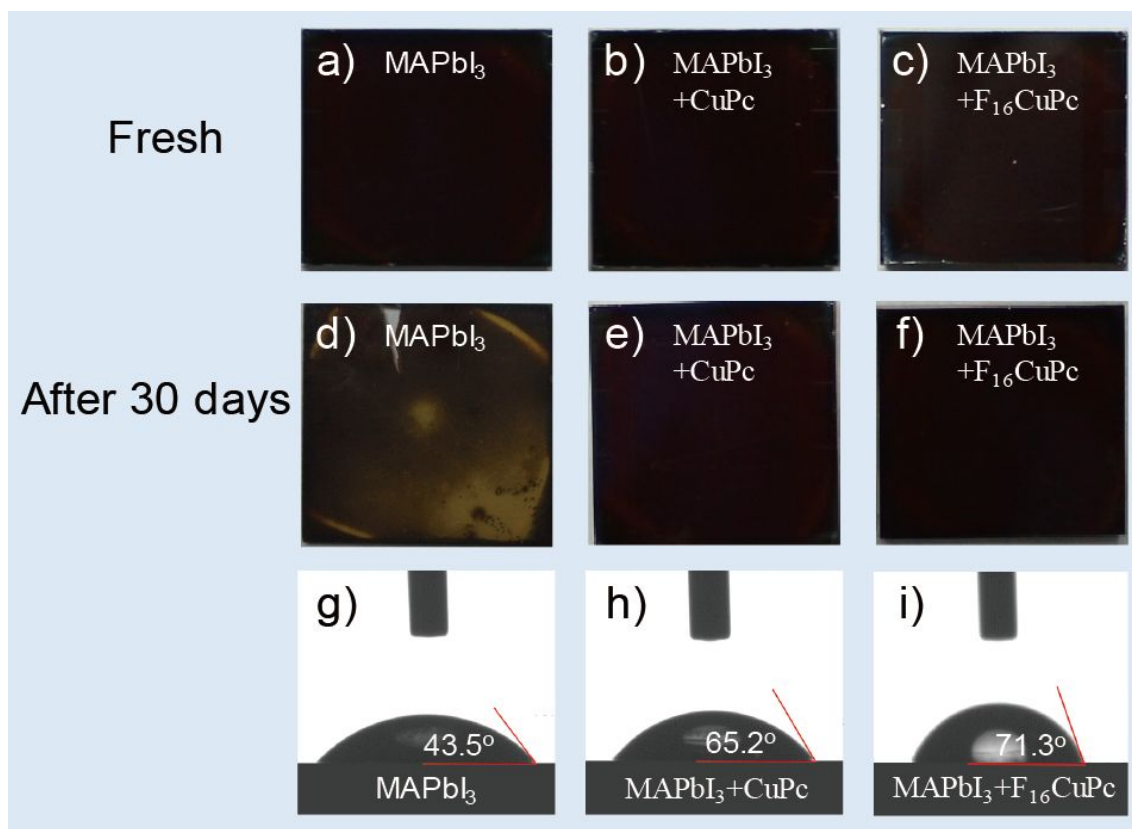

Figure S9. Images of a)-f) are the corresponding perovskite films before and after 30 days under the ambient environment with a 30% relative humidity at room temperature; the contact angles between perovskite films and the water droplet: g) MAPbI<sub>3</sub>, h) MAPbI<sub>3</sub>+CuPc, i) MAPbI<sub>3</sub>+F<sub>16</sub>CuPc.



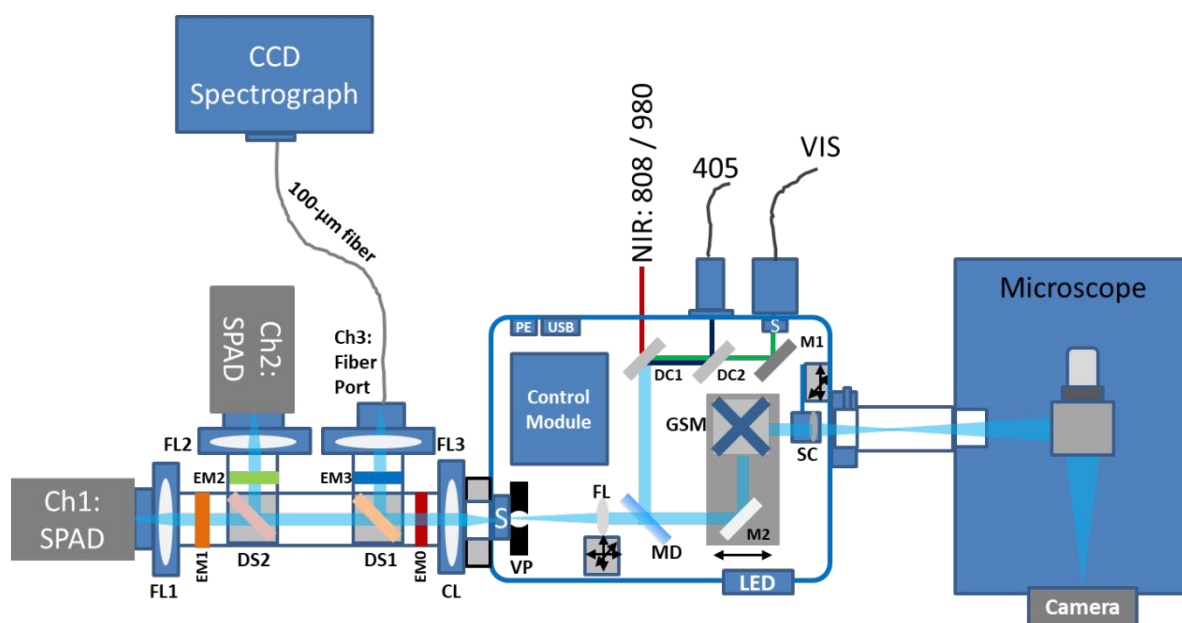

Figure S10. Schematic of the time-resolved confocal imaging system.

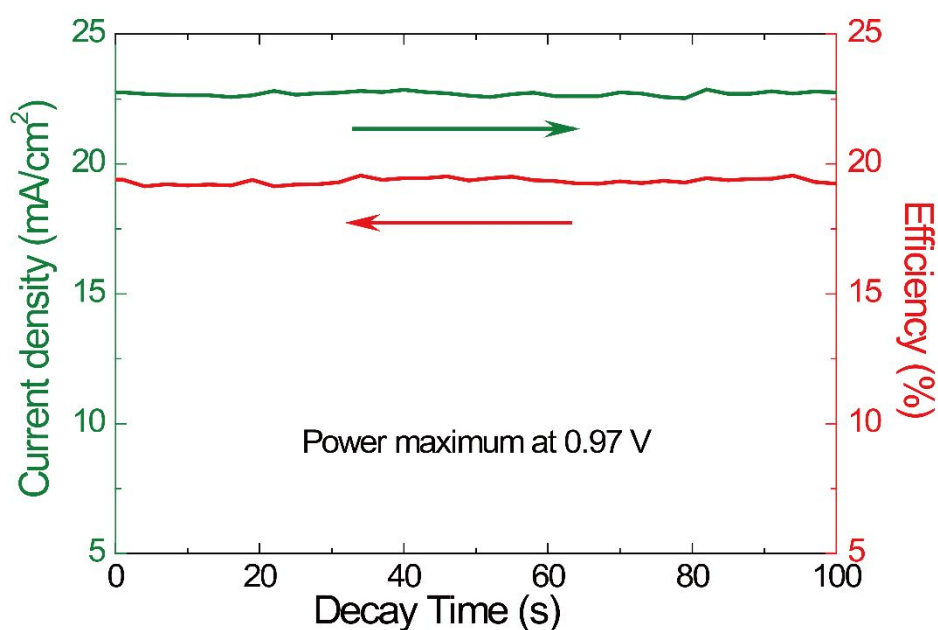

Figure S11 Steady output of photocurrent density and power conversion efficiency measured under maximum power at 0.97 V. The cell was illuminated under 1 sun AM1.5G prior to the start of the measurement.

Table S1 Photovoltaic parameters of planar heterojunction PSCs with different concentration of CuPc in CB.

| CuPc in CB | $V_{oc}$<br>(V) | $J_{sc}$<br>(mA/cm <sup>2</sup> ) | $FF$ | $PCE$<br>(%) |
|------------|-----------------|-----------------------------------|------|--------------|
|------------|-----------------|-----------------------------------|------|--------------|

|           |      |      |      |      |
|-----------|------|------|------|------|
| 0 mg/mL   | 1.07 | 22.7 | 0.77 | 18.7 |
| 0.1 mg/mL | 1.10 | 22.6 | 0.77 | 19.1 |
| 0.2 mg/mL | 1.11 | 22.7 | 0.78 | 19.7 |
| 0.3 mg/mL | 1.10 | 22.3 | 0.77 | 18.9 |
| 0.4 mg/mL | 1.07 | 22.3 | 0.75 | 17.9 |
| 0.5 mg/mL | 1.08 | 21.7 | 0.76 | 17.8 |
| 0.6 mg/mL | 1.06 | 21.5 | 0.73 | 16.6 |

Table S2 Photovoltaic parameters of planar heterojunction PSCs with different concentration of F<sub>16</sub>CuPc in CB.

| F <sub>16</sub> CuPc in CB | V <sub>oc</sub><br>(V) | J <sub>sc</sub><br>(mA/cm <sup>2</sup> ) | FF   | PCE <sup>a)</sup><br>(%) |
|----------------------------|------------------------|------------------------------------------|------|--------------------------|
| 0 mg/mL                    | 1.07                   | 23.0                                     | 0.77 | 18.9                     |
| 0.1 mg/mL                  | 1.11                   | 22.9                                     | 0.77 | 19.3                     |
| 0.2 mg/mL                  | 1.15                   | 22.9                                     | 0.78 | 20.2                     |
| 0.3 mg/mL                  | 1.13                   | 22.8                                     | 0.76 | 19.6                     |
| 0.4 mg/mL                  | 1.14                   | 22.9                                     | 0.75 | 19.4                     |
| 0.5 mg/mL                  | 1.08                   | 23.1                                     | 0.76 | 18.9                     |
| 0.6 mg/mL                  | 1.09                   | 22.4                                     | 0.74 | 17.9                     |
